# Supplementary material for: Implementation of a Delayed Prescribing Model to Reduce Antibiotic Prescribing for Suspected Upper Respiratory Tract Infections in a Hospital Outpatient Department, Ghana
Source: Preprints.org preprint supplement (doi:10.20944/preprints202009.0008.v1), 2020-09-01

**Appendix A**

**Typography of approaches to delayed antibiotic prescription**

**
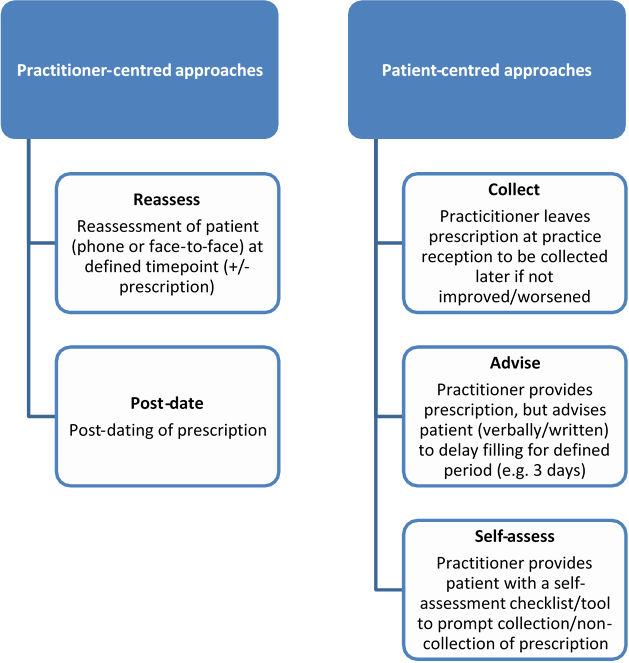
**

**Appendix B**

Patient pathways for project of delayed prescribing in LEKMA Hospital outpatients’ department, Ghana


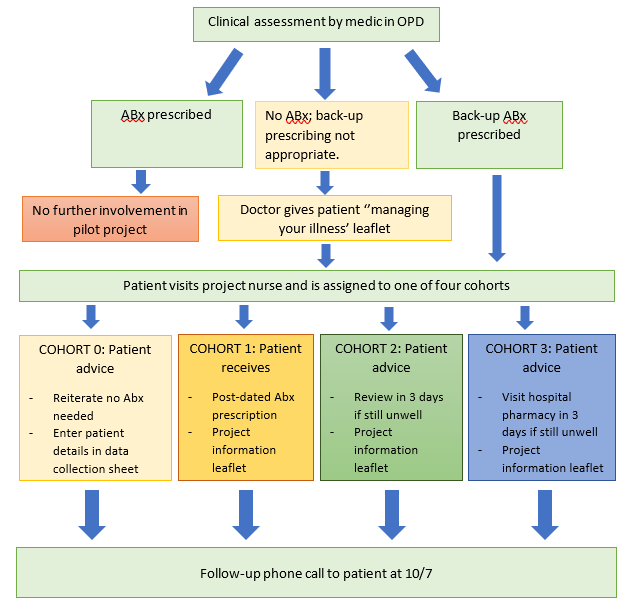

Supplement: Supplementary file 1 [file supplementary]
